# Supplementary material
Source: PubMed Central journal article supplement (PMC6065193)
Supplement: supp_RA118.002441_136042_2_supp_144485_p9h555.pdf [file supp_RA118.002441_136042_2_supp_144485_p9h555.pdf]

## Supporting Information

The architecture of the OmpC-MlaA complex sheds light on the maintenance of outer membrane lipid asymmetry in *Escherichia coli*

**Jiang Yeow<sup>1,2,\*</sup>, Kang Wei Tan<sup>1,\*</sup>, Daniel A. Holdbrook<sup>3,\*</sup>, Zhi-Soon Chong<sup>1</sup>, Jan K. Marzinek<sup>3,4</sup>, Peter J. Bond<sup>3,4,†</sup>, Shu-Sin Chng<sup>1,5,†</sup>**

<sup>1</sup>Department of Chemistry, National University of Singapore, Singapore 117543;

<sup>2</sup>National University of Singapore Graduate School for Integrative Sciences and Engineering (NGS), Singapore 117456;

<sup>3</sup>Bioinformatics Institute, Agency for Science, Technology, and Research (A\*STAR), Singapore 138671;

<sup>4</sup>Department of Biological Sciences, National University of Singapore, Singapore 117543;

<sup>5</sup>Singapore Center for Environmental Life Sciences Engineering, National University of Singapore (SCELSE-NUS), Singapore 117456

\*These authors contributed equally to this work.

### Table of contents

#### Supplementary Tables S1 to S4

Table S1. Bacterial strains used in this study

Table S2. Plasmids used in this study

Table S3. Primers used in this study.

Table S4. Summary of all-atom molecular simulations: system compositions and simulation times

#### Supplementary Figures S1 to S14

Figure S1. Seven more positions at the dimeric interface of the OmpC trimer contact MlaA.

Figure S2. SEC-MALS analysis of the OmpC-MlaA complex revealing that one copy of MlaA binds to the OmpC trimer.

Figure S3. N-terminal sequencing and MS/MS analyses identified two specific MlaA peptides binding to OmpC.

Figure S4. Residue pairs on MlaA predicted to contact each other based on coevolution analysis allow the formation of disulfide bonds when substituted with cysteines.

Figure S5. The surface of MlaA is mostly hydrophobic.

Figure S6. The MlaA structure modelled from co-evolution analysis is more stable in the lipid bilayer.

Figure S7. MlaA behaves like an integral membrane protein and is resistant to extraction from membranes under various conditions.

Figure S8. Six major clusters of all-atomistic MD simulated OmpC-MlaA structure depict how MlaA interacts with OmpC in two possible orientations in the OM bilayer.

Figure S9. All six major clusters of MlaA structure from all-atomistic MD simulations of the OmpC-MlaA complex with putative hydrophilic channels depicted.

Figure S10. Substituted cysteine accessibility for residues in MlaA largely agrees with their predicted locations.

Figure S11. Brief analyses of the crystal structures of MlaA-porin complexes.

Figure S12. All single alanine mutations and most double arginine substitutions in the channel, except D161R/D167R, do not disrupt function in MlaA.

Figure S13. Mutations in functional regions of MlaA do not significantly affect protein levels or its interaction with OmpC.

Figure S14. Mutations on residues G19 and R92 do not affect OmpC levels in cells, but weaken trimer stability in vitro.

**Supplementary Tables.**

**Table S1. Bacterial strains used in this study**

| <b>Strains</b> | <b>Relevant genotypes and characteristics</b>                                                                                         | <b>References</b> |
|----------------|---------------------------------------------------------------------------------------------------------------------------------------|-------------------|
| MC4100         | <i>F- araD139 Δ(argF-lac) U169 rpsL150 relA1 flbB5301 ptsF25 deoC1 ptsF25 thi</i>                                                     | (1)               |
| NovaBlue       | <i>endA1 hsdR17 (rK12- mK12+) supE44 thi-1 recA1 gyrA96 relA1 lac F' [proA+ B+ lacIq ZΔM15::Tn10]</i>                                 | Novagen           |
| BL21(λDE3)     | <i>fhuA2 [lon] ompT gal (λDE3) [dcm] ΔhsdS</i><br><i>λDE3 = λ sBamHIo ΔEcoRI-B</i><br><i>int::(lacI::PlacUV5::T7 gene1) i21 Δnin5</i> | Novagen           |
| TKW001         | BL21(λDE3) Δ <i>ompF::kan</i>                                                                                                         | This study        |
| CZS010         | MC4100 Δ <i>m1aA::kan</i>                                                                                                             | (2)               |
| CZS015         | MC4100 Δ <i>ompC::kan</i>                                                                                                             | (2)               |
| NR1216         | MC4100 Δ <i>dsbA::kan</i>                                                                                                             | (3)               |
| CZS576         | MC4100 Δ <i>ompC::kan-(P<sub>rha-tse2</sub>)</i>                                                                                      | This study        |
| CZS594         | MC4100 Δ <i>ompC::ompC</i>                                                                                                            | This study        |
| CZS608         | MC4100 Δ <i>ompC::ompC<sub>R92A</sub></i>                                                                                             | This study        |
| CZS609         | MC4100 Δ <i>ompC::ompC<sub>R92L</sub></i>                                                                                             | This study        |
| CZS610         | MC4100 Δ <i>ompC::ompC<sub>G19W</sub></i>                                                                                             | This study        |
| CZS611         | MC4100 Δ <i>ompC::ompC<sub>G19W/R92L</sub></i>                                                                                        | This study        |

**Table S2. Plasmids used in this study**

| Plasmids                    | Relevant genotypes and characteristics                                                                                                                                                                  | References |
|-----------------------------|---------------------------------------------------------------------------------------------------------------------------------------------------------------------------------------------------------|------------|
| pET22b(+)                   | pT7lac inducible expression vector, contains N-terminal PelB signal peptide for periplasmic localization; Amp <sup>R</sup>                                                                              | Novagen    |
| pET23/42                    | pT7 inducible expression vector, contains multiple cloning site of pET42a(+) in pET23a(+) backbone; Amp <sup>R</sup>                                                                                    | (4)        |
| pSLC-246                    | Template plasmid encoding kanamycin resistance gene for positive selection and toxin gene ( <i>tse2</i> ) under the control of rhamnose inducible promoter (P <sub>rhaB</sub> ) for negative selection. | (5)        |
| pSup-BpaRS-6TRN             | Encodes an orthogonal tRNA and aminoacyl-tRNA synthetase permitting ribosomal incorporation of <i>pBpa</i> at TAG stop codons                                                                           | (6)        |
| pKM208                      | A variation of pKM201 expresses the <i>lacI</i> repressor gene that keep expression of <i>red</i> and <i>gam</i> under tight control prior to IPTG induction                                            | (7)        |
| pACYC184                    | Low copy cloning vector; Cam <sup>R</sup>                                                                                                                                                               | (8)        |
| pCDFDuet-1                  | pT7 inducible expression vector; Spec <sup>R</sup>                                                                                                                                                      | Novagen    |
| pDSW206                     | Promoter down mutations in -35 and -10 of pTrc99a; Amp <sup>R</sup>                                                                                                                                     | (9)        |
| pET23/42- <i>mIaA-His</i>   | Encodes full length MlaA with C-terminal His8 tag; Amp <sup>R</sup> (p- <i>mIaA-His</i> )                                                                                                               | (2)        |
| pET23/42- <i>dmlaA-His</i>  | Encodes delipidated version of MlaA (a.a. 19-250) with N-terminal PelB signal peptide (for periplasmic localization) and C-terminal His8 tag; Amp <sup>R</sup> (p- <i>dmlaA-His</i> )                   | (2)        |
| pCDF- <i>mIaA-His</i>       | Encodes full length MlaA with C-terminal His8 tag; Spec <sup>R</sup>                                                                                                                                    | This study |
| pCDF- <i>dmlaA-His</i>      | Encodes delipidated version of MlaA (a.a. 19-250) with N-terminal PelB signal peptide (for periplasmic localization) and C-terminal His8 tag; Spec <sup>R</sup>                                         | This study |
| pET22b(+)- <i>dmlaA-His</i> | Encodes delipidated version of MlaA (a.a. 19-250) with N-terminal PelB signal peptide and C-terminal His6 tag; Amp <sup>R</sup>                                                                         | (2)        |
| pACYC184- <i>ompC</i>       | Encodes full length OmpC under its native promoter; Cam <sup>R</sup>                                                                                                                                    | (2)        |
| pDSW206- <i>ompC</i>        | Encodes full length OmpC inducible by <i>lacI</i> promoter; Amp <sup>R</sup>                                                                                                                            | This study |

**Table S3. Primers used in this study.**

| <b>Primers</b> | <b>Sequence (5' to 3')*</b>                               |
|----------------|-----------------------------------------------------------|
| ompC_D7B FP    | GAAGTTTACAACAAAT <u>AG</u> GGCAACAAATTAGATCTGTACG<br>G    |
| ompC_D7B RP    | GATCTAATTTGTTGCCCTA <u>TTT</u> GTTGTAAACTTCAGCAGCG        |
| ompC_G8B FP    | GAAGTTTACAACAAAGACT <u>AGA</u> ACAAATTAGATCTGTACG<br>G    |
| ompC_G8B RP    | GATCTAATTTGTT <u>CTAG</u> TCTTTGTTGTAAACTTAGCAGCG         |
| ompC_F40B FP   | CCTACATGCGTCTTGGCT <u>AGAA</u> AGGTGAAACTCAGG             |
| ompC_F40B RP   | GTTTCACCTTT <u>CTAG</u> CCAAGACGCATGTAGGTCTGG             |
| ompC_L50B FP   | G GTT ACT GAC CAG <u>TAG</u> ACC GGT TAC GGC CAG TG       |
| ompC_L50B RP   | GCC GTA ACC GGT <u>CTACT</u> G GTC AGT AAC CTG AGT TTC    |
| ompC_Y53B FP   | CCAGCTGACCGGTT <u>AG</u> GGCCAGTGGAATATC                  |
| ompC_Y53B RP   | TCCCACTGGCCCTA <u>ACCG</u> GTCAGCTGGTCAGTAAC              |
| ompC_L80B FP   | GCA TTC GCA GGTT <u>AGAA</u> TTC CAG GAT GTG GG           |
| ompC_L80B RP   | CATCCTGGAATTT <u>CTA</u> ACCTGCGAATGCCACAC                |
| ompC_K81B FP   | CATTCGCAGGTCTGT <u>AG</u> TTCCAGGATGTGGGTTC               |
| ompC_K81B RP   | CACATCCTGGA <u>ACTAC</u> AGACCTGCGAATGCCACAC              |
| ompC_F82B FP   | GGCATTTCGCAGGTCTGAA <u>ATAG</u> CAGGATGTGGGTTC            |
| ompC_F82B RP   | GTCGAAAGA <u>ACCCACATCCTGCTA</u> TTTCAGACCTGC             |
| ompC_Q83B FP   | GGTCTGAAATT <u>CTAG</u> GATGTGGGTCTTTTCGAC                |
| ompC_Q83B RP   | AGA <u>ACCCACATCCTA</u> GAATTTTCAGACCTGCG                 |
| ompC_G86B FP   | TTC CAG GAT GTGT <u>AGT</u> CT TTC GAC TAC GGT CGT AAC    |
| ompC_G86B RP   | GTAGTCGAAAG <u>ACTACACATCCTGGA</u> ATTTTCAGACCTGC         |
| ompC_F88B FP   | GATGTGGGTCT <u>TAG</u> ACTACGGTCGTA <u>ACTAC</u> GG       |
| ompC_F88B RP   | ACGACCGTAGTC <u>CTA</u> AGA <u>ACCCACATCCTG</u> G         |
| ompC_Y90B FP   | GGTCTTTTCGACT <u>AG</u> GGTTCGTA <u>ACTAC</u> GGCG        |
| ompC_Y90B RP   | GTAGTTACGAC <u>CCTAG</u> TCGAAAGA <u>ACCCACATCCTG</u>     |
| ompC_A129B FP  | GGTAACGGCTT <u>CTAG</u> ACCTACCGTA <u>ACTGAC</u>          |
| ompC_A129B RP  | GTTACGGTAGGT <u>CTAGA</u> AGCCGTTACCACGCTG                |
| ompC_Y131B FP  | CGGCTTCGCGAC <u>CTAG</u> CGTA <u>ACTGACTTCTT</u> C        |
| ompC_Y131B RP  | GTCAGTGTTACG <u>CTAG</u> GTTCGCGAAGCCGTTACC               |
| ompC_N133B FP  | GCGACCTACCGT <u>TAG</u> ACTGACTTCTTCGGTCTG                |
| ompC_N133B RP  | GAAGAAGTCAGT <u>CTAAC</u> GGTAGGTTCGCGAAGCC               |
| ompC_G138B FP  | CACTGACTTCTT <u>CTAG</u> CTGGTTGACGGCCTGA <u>ACTTTG</u> C |
| ompC_G138B RP  | GGCCGTCAACCAG <u>CTA</u> GAAGAAGTCAGTGTTACGG              |
| ompC_L143B FP  | CTGGTTGACGG <u>CTAGA</u> ACTTTGCTGTTACGTACC               |
| ompC_L143B RP  | CAGCAAAGTT <u>CTAG</u> CCGTCAACCAGACCGAAG                 |
| ompC_Y149B FP  | CTTTGCTGTTCAGT <u>AGC</u> AGGGTAAAAACGGCAAC               |
| ompC_Y149B RP  | GTTTTTACCCTG <u>CTACT</u> GAAACAGCAAAGTTCAGGCCG           |
| ompC_G151B FP  | GTTCAGTACCAGT <u>AG</u> AAAAACGGCAACCCATCTGGTG            |
| ompC_G151B RP  | GTTGCCGTTTTT <u>CTACT</u> GGTACTGAACAGCAAAGTTC            |
| ompC_Q266B FP  | GTTGCTCAGT <u>ACTAG</u> TTCGACTTCGGTCTGCGTC               |
| ompC_Q266B RP  | CCGAAGTCGA <u>ACTAG</u> TACTGAGCAACAGCTTCG                |
| ompC_F267B FP  | GCTCAGTACCAGT <u>AG</u> ACTTCGGTCTGCGTCCG                 |

ompC\_F267B RP CAGACCGAAGTCCTACTGGTACTGAGCAACAGC  
ompC\_L271B FP GTTCGACTTCGGTTAGCGTCCGTCCCTGGCTTAC  
ompC\_L271B RP CAGGGACGGACGCTAACCGAAGTCGAACTGGTAC  
ompC\_P273B FP CTTCGGTCTGCGTTAGTCCCTGGCTTACCTGCAG  
ompC\_P273B RP GTAAGCCAGGGACTAACGCAGACCGAAGTCGAACTGG  
ompC\_L275B FP GCGTCCGTCCTAGGCTTACCTGCAGTCTAAAG  
ompC\_L275B RP GCAGGTAAGCCTAGGACGGACGCAGACCGAAG  
ompC\_A302B FP GTTGATGTTGGTTAGACCTACTACTTCAACAAAAACATGT  
CC  
ompC\_A302B RP GAAGTAGTAGGTCTAACCAACATCAACATATTTTCAGGATA  
TC  
ompC\_Y304B FP GTTGGTGCTACCTAGTACTTCAACAAAAACATGTCC  
ompC\_Y304B RP TTTGTTGAAGTACTAGGTAGCACCAACATCAACATATTTTC  
AG  
ompC\_M310B FP CTTCAACAAAAACTAGTCCACCTACGTTGACTACAAAATC  
ompC\_M310B RP CAACGTAGGTGGACTAGTTTTTTGTTGAAGTAGTAGG  
ompC\_L340B FP AACATCGTAGCTTAGGGTCTGGTTTACCAGTTC  
ompC\_L340B RP GTA AAC CAG ACCCTAAGC TAC GAT GTT ATC AGT GTT  
G  
  
ompC\_NS\_N5 ATGAAAGTTAAAGTACTGTCCCTCCTGGTCCCAGCTCTGC  
GTGTAG  
GCTGGAGCTGCTTC  
ompC\_NS\_C3 TTAGAACTGGTAAACCAGACCCAGAGCTACGATGTTATCA  
CATATG  
AA TATCCTCCTTAG  
ompC\_NS\_N5\_C ATGAAAGTTAAAGTACTGTCCCTCCTG  
ompC\_NS\_C3\_C TTAGAACTGGTAAACCAGACCCAG

mlaA\_Q126A FP GAACCCGAAACTGGCGCGGACTGAACCTCACCGC  
mlaA\_Q126A RP GGTTCAGTCCGCGCCAGTTTCGGGTTTCGCCATC  
mlaA\_H131A FP GGACTGAACCTGCGCGCTTCGGTAGTACGCTTG  
mlaA\_H131A RP CTACCGAAGCGCGCAGGTTTCAGTCCGTTGCAG  
mlaA\_F152A FP GTTCAGTTACCGCGTACGGTAGCTTCACGCTG  
mlaA\_F152A RP GAAGCTACCGTACGCGGTAAGTGAACGTAAGG  
mlaA\_S155A FP CCGTTCTACGGTGCGTTCACGCTGCGTGATGAC  
mlaA\_S155A RP CGCAGCGTGAACGCACCGTAGAACGGTAACTG  
mlaA\_D160A FP TTCACGCTGCGTGCGGACGGTGGTGATATGGCG  
mlaA\_D160A RP ATCACCACCGTCCGCACGCAGCGTGAAGCTACC  
mlaA\_D161A FP CGCTGCGTGATGCGGGTGGTGATATGGCGGATG  
mlaA\_D161A RP CATATCACCACCCGCATCACGCAGCGTGAAGC  
mlaA\_D164A FP GATGACGGTGGTGCGATGGCGGATGGTTTTTAC  
mlaA\_D164A RP ACCATCCGCCATCGCACCCACCGTCATCACGCAG  
mlaA\_D167A FP GACGGTGGTGATATGGCGCGGGTTTTTACCCG  
mlaA\_D167A RP AAGAACCGGGTAAAAACCCGCGCCATATCACC  
mlaA\_V182A FP GCCGATGTCTGCGGGTAAATGGACGCTTGAAG  
mlaA\_V182A RP CGTCCATTTACCCGCAGACATCGGCCAGGTCAG

|                                |                                                            |
|--------------------------------|------------------------------------------------------------|
| mlaA_E188A FP                  | AAATGGACGCTT <u>GCGGGG</u> ATCGAAACCCGCGC                  |
| mlaA_E188A RP                  | GTTTCGATCCCC <u>GCAAGCGT</u> CCATTTACCCAC                  |
| mlaA_T192A FP                  | GAAGGGATCGAAGCGCGCGCTCAGCTGCTG                             |
| mlaA_T192A RP                  | CTGAGCGCG <u>GCTT</u> CGATCCCTTCAAGCGTC                    |
| mlaA_Q195A FP                  | GAAACCCGCGCT <u>GCGCTG</u> CTGGATTCCGATGG                  |
| mlaA_Q195A RP                  | GAATCCAGCAG <u>GCGAGCGG</u> GTTTCGATCCC                    |
| mlaA_N226A FP                  | GATTTTCATCGCT <u>GCGGGC</u> GGCGAACTCAAACCG                |
| mlaA_N226A RP                  | GAGTTCGCCGCC <u>GCGAGCG</u> ATGAAATCATGACG                 |
| mlaA_D61R FP                   | GTCGCCTGGCGT <u>GCTATG</u> TTCCGCAACCGGCG                  |
| mlaA_D61R RP                   | TTGCGGAACATAG <u>GCGACGCC</u> AGGCGACAGCGAC                |
| mlaA_D160R FP                  | TTCACGCTGCGT <u>GCGACGGT</u> GGTGATATGGCG                  |
| mlaA_D160R RP                  | ATCACCACCGT <u>GCGACGCAG</u> CGTGAAGCTACC                  |
| mlaA_D161R FP                  | CGCTGCGTGAT <u>GCGGGT</u> GGTGATATGGCGGATG                 |
| mlaA_D161R RP                  | CATATCACCACCG <u>GATCAC</u> GCAGCGTGAAGC                   |
| mlaA_D164R FP                  | GATGACGGTGGT <u>GCGATGG</u> CGGATGGTTTTTAC                 |
| mlaA_D164R RP                  | ACCATCCGCCAT <u>GCGACC</u> ACCGTCATCACGCAG                 |
| mlaA_D167R FP                  | GACGGTGGTGATATGGCG <u>GCGGGT</u> TTTTTACCCG                |
| mlaA_D167R RP                  | AAGAACC GGTTAAAACCG <u>GCGGCC</u> ATATCACC                 |
| mlaA_E188R FP                  | AAATGGACGCTT <u>GCGGGG</u> ATCGAAACCCGCGC                  |
| mlaA_E188R RP                  | GTTTCGATCCCC <u>GCAAGCGT</u> CCATTTACCCAC                  |
| mlaA_D160R D161R FP            | TTCACGCTGCGT <u>GCGCGGGT</u> GGTGATATGGCG                  |
| mlaA_D160R D161R RP            | ATCACCACCG <u>GCGGCGAC</u> GCAGCGTGAAGCTACC                |
| mlaA_D160R D164R FP            | TTCACGCTGCGT <u>GCGGACGGT</u> G <u>GTCGCATG</u> GCG        |
| mlaA_D160R D164R RP            | <u>GCGACC</u> ACCGT <u>GCGGACGCAG</u> CGTGAAGCTACC         |
| mlaA_D161R D164R FP            | CGCTGCGTGAT <u>GCGGGTGGT</u> <u>GCGATGG</u> CGGATG         |
| mlaA_D161R D164R RP            | CAT <u>GCGACC</u> ACCG <u>GATCAC</u> GCAGCGTGAAGC          |
| mlaA_D161R D167R FP            | CGCTGCGTGAT <u>GCGGGTGGT</u> GATATGGCG <u>GCGG</u>         |
| mlaA_D161R D167R RP            | CATATCACCACCG <u>GATCAC</u> GCAGCGTGAAGC                   |
| mlaA_D164R D167R FP            | GATGACGGTGGT <u>GCGATG</u> GCG <u>GCGGGT</u> TTTTTAC       |
| mlaA_D164R D167R RP            | ACCG <u>GCGGCC</u> AT <u>GCGACC</u> ACCGTCATCACGCAG        |
| 3D3R FP SDM                    | CTTCACGCTGCGT <u>GCGCGGGTGGT</u> <u>GCG</u>                |
| 3D3R RP SDM                    | ATGGCGGATGGTTTTTACC                                        |
| F <sup>152</sup> YGSF_to_5A FP | AACCATCCGCCAT <u>GCGACC</u> ACCG <u>GCGGCGAC</u> GCAGCGTGA |
| F <sup>152</sup> YGSF_to_5A RP | AGCTACCG                                                   |
| GVGYG_3G3A_FP                  | GTTCAGTTACCG <u>GCGGGCGGGCGGCGG</u> ACGCTGCGTGATG          |
| GVGYG_3G3A_FP                  | ACGGTGG                                                    |
| GVGYG_3G3A_FP                  | CATCACGCAGCGT <u>GCGCGCCGCGCCGCGCGG</u> TAACTGAAC          |
| GVGYG_3G3A_FP                  | GTAAGG                                                     |
| GVGYG_3G3A_FP                  | CTTGGTCATTAT <u>GCGGTGGCGTATGCGC</u> CTTACGTTACGTT         |
| GVGYG_3G3A_FP                  | ACCG                                                       |
| GVGYG_3G3A_FP                  | CTGAACGTAAGG <u>GCGCATA</u> <u>GCCACCGCATA</u> ATGACCAAG   |
| GVGYG_3G3A_FP                  | CGTAC                                                      |
| GVGYG_3G3P_FP                  | CTTGGTCATTAT <u>CCTGTGCCTTATCCT</u> CCTTACGTTACGTT         |
| GVGYG_3G3P_FP                  | ACCG                                                       |

GVGYG\_3G3P\_RP

mlaA\_P151A FP  
mlaA\_P151A RP  
Y<sup>147</sup>VQL\_to\_4A FP

Y<sup>147</sup>VQL\_to\_4A RP

mlaA\_M39C FP  
mlaA\_M39C RP  
mlaA\_Y40C FP  
mlaA\_Y40C RP  
mlaA\_F42C FP  
mlaA\_F42C RP  
mlaA\_N43C FP  
mlaA\_N43C RP  
mlaA\_D48C FP  
mlaA\_D48C RP  
mlaA\_D61C FP  
mlaA\_D61C RP  
mlaA\_F74C FP  
mlaA\_F74C RP  
mlaA\_L78C FP  
mlaA\_L78C RP  
mlaA\_M84C FP  
mlaA\_M84C RP  
mlaA\_N86C FP  
mlaA\_N86C RP  
mlaA\_D92C FP  
mlaA\_D92C RP  
mlaA\_T107C FP  
mlaA\_T107C RP  
mlaA\_F114C FP  
mlaA\_F114C RP  
mlaA\_Q126C FP  
mlaA\_Q126C RP  
mlaA\_T136C FP  
mlaA\_T136C RP  
mlaA\_Y144C FP  
mlaA\_Y144C RP  
mlaA\_Q149C FP  
mlaA\_Q149C RP  
mlaA\_L150C FP  
mlaA\_L150C RP

CTGAACGTAAGGAGGATAAGGCACAGGATAATGACCAAG  
CGTAC  
TACGTTCAAGTTAGCGTTCTACGGTAGCTTACGCTG  
GCTACCGTAGAACCGCTAACTGAACGTAAGGCC  
GGTTATGGGCCTGCGGCGGCGGCCGCGTTCTACGGTAGCT  
TCAC  
CTACCGTAGAACGGGCGCCGCCGCGCAGGCCATAACCCA  
CGCC

TTCAACCGCACCTGCTACAACTTCAACTTCAATG  
AGTTGAAGTTGTAGCAGGTGCGGTGAACCCTTC  
CAACCGCACCATGTGCAACTTCAACTTCAATG  
AGTTGAAGTTGACATGGTGCGGTGAACCC  
ACCATGTACAACTGCAACTTCAATGTATTAGAC  
TACATTGAAGTTGCAGTTGTACATGGTGCAGTT  
CATGTACAACTTCTGCTTCAATGTATTAGACCCG  
TAATACATTGAAGCAGAAGTTGTACATGGTGCGG  
CTTCAATGTATTATGCCCGTATATTGTTCGACC  
ACAATATACGGGCATAATACATTGAAGTTGAAG  
GTCGCCTGGCGTTGCTATGTTCCGCAACCGGCG  
TTGCGGAACATAGCAACGCCAGGCGACAGCGAC  
GTTTGAGCAACTGCACTGGCAACCTTGAAGAACC  
CAAGGTTGCCAGTGCAGTTGCTCAAACCGTTACG  
CTTTACTGGCAACTGCGAAGAACTGCGGTGATGG  
CGCAGGTTCTTCGCAGTTGCCAGTAAAGTTGCTCAAAC  
GAACCTGCGGTTGCGTTAACTACTTCTTGCAGG  
GAAGTAGTTAACGCACACCGCAGGTTCTTCAAGG  
GCGGTGATGGTTTGCTACTTCTTGCAGGGCGA  
CTGCAAGAAGTAGCAAACCATCACCGCAGGTTCTTC  
TAACTACTTCTTGCAGGGCTGCCCTTATCAGGGG  
GACCATCCCCTGATAAGGGCAGCCCTGCAAGAAG  
CGTTTTTCTGAACTTGCATTTTGGGGATGGGCGG  
CATCCCCAAAATTGCAGTTCAGGAAAAAGCGGGTAAAGTG  
G  
GGGATGGGCGGTTTGCATTGATGTTGCAGGGATG  
GCAACATCAATGCAACCGCCCATCCCCAAAATGG  
GAACCCGAAACTGTGCCGGACTGAACCTCACCGC  
GGTTCAGTCCGGCACAGTTTCGGGTTCGCCATC  
CGCTTCGGTAGTTTGCCTTGGTCATTATGGCGTG  
ATAATGACCAAGGCAACTACCGAAGCGGTGAGG  
ATGGCGTGGGTTGCGGGCCTTACGTTCAGTTACC  
GAACGTAAGGCCCGCAACCCACGCCATAATGAC  
GGGCCTTACGTTTGCTTACCGTTCTACGGTAGC  
GTAGAACGGTAAGCAAACGTAAGGCCATAACC  
TTACGTTCAAGTGCCCGTTCTACGGTAGCTTC  
ACCGTAGAACGGGCACTGAACGTAAGGCC

|                                       |                                                    |
|---------------------------------------|----------------------------------------------------|
| mlaA_T157C FP                         | CTACGGTAGCTTCT <u>GCCTGCGT</u> GATGACGGTGG         |
| mlaA_T157C RP                         | TCATCACGCAG <u>G</u> CAGAAGCTACCGTAGAACGG          |
| mlaA_D161C FP                         | CGCTGCGTGATT <u>GCGGTGGT</u> GATATGGCGGATG         |
| mlaA_D161C RP                         | CATATCACCACCG <u>CAATCACGCAG</u> CGTGAAGC          |
| mlaA_D167C FP                         | GACGGTGGT <u>GATATGGCGT</u> <u>GCGGTTTTT</u> ACCCG |
| mlaA_D167C RP                         | AAGAACC <u>GGTAAAAACC</u> <u>GCA</u> CGCCATATCACC  |
| mlaA_K184C FP                         | CCGATGTCTGTGGGTT <u>GCTGGAC</u> GCTTGAAG           |
| mlaA_K184C RP                         | GATCCCTTCAAGCGTCC <u>AGCA</u> ACCCACAGAC           |
| mlaA_E188C FP                         | AAATGGACGCTTT <u>GCGGGATCGAA</u> ACCCGCGC          |
| mlaA_E188C RP                         | GTTTCGATCCC <u>GCA</u> AAGCGTCCATTTACCCAC          |
| mlaA_T192C FP                         | GAAGGGATCGAAT <u>TGCCGCGCTCAGCTGCTG</u>            |
| mlaA_T192C RP                         | CTGAGCGCGG <u>CATTCGATCCCTTCAAGCGTC</u>            |
| mlaA_R193C FP                         | GGGATCGAAACCT <u>TGCGCTCAGCTGCTGGATTCC</u>         |
| mlaA_R193C RP                         | CAGCAGCTGAGCG <u>CAGGTTTTCGATCCCTTCAAGC</u>        |
| mlaA_Q195C FP                         | GAAACCCGCGCT <u>TGCCTGCTGGATTCCGATGG</u>           |
| mlaA_Q195C RP                         | GAATCCAGCAGG <u>CAAGCGCGGGTTTTCGATCCC</u>          |
| mlaA_R204C FP                         | GATTCCGATGGTCTGCTG <u>TGCCAGTCGTCCGATCC</u>        |
| mlaA_R204C RP                         | AATATAAGGATCGGACGACTG <u>GCA</u> CAGCAGACCATC      |
| mlaA_P209C FP                         | CAGTCGTCCGATT <u>TGCTATATTATGGTGCGCGAAG</u>        |
| mlaA_P209C RP                         | GCACCATAATATAG <u>CA</u> ATCGGACGACTGACGCAG        |
| mlaA_R220C FP                         | GCGAAGCGTACTTCCAGT <u>TGCCATGATTTTCATC</u>         |
| mlaA_R220C RP                         | CATTAGCGATGAAATCATG <u>GCA</u> CTGGAAGTAC          |
| mlaA_N226C FP                         | GATTTTCATCGCTT <u>TGCGGCGGCGAACTCAAACCG</u>        |
| mlaA_N226C RP                         | GAGTTCGCCCGC <u>CAAGCGATGAAATCATGACG</u>           |
| mlaA_G227C FP                         | TTCATCGCTAATT <u>TGCGGCGAACTCAAACCGCAG</u>         |
| mlaA_G227C RP                         | GTTTGAGTTCGCC <u>GCAATTAGCGATGAAATCATG</u>         |
| <br>                                  |                                                    |
| pCDFDuet-1_pelB_mlaA_Chis<br>NdeI_Fwd | CGCT <u>CATATGAAATACCTGCTGCCGACCGCTGCTGC</u>       |
| pCDFDuet-1_FL_mlaA_Chis<br>NdeI_Fwd   | CGCT <u>CATATGAAGCTTCGCCTGT</u> CG                 |
| pCDFDuet-1_mlaA_AvrII Rev             | AGAT <u>CCTAGGTCAGTGGTGGTGGTGGTGGT</u> GCTCGAG     |
| pDSW206_ompC_NcoI Fwd                 | CGAT <u>CCATGGCAAAAGTTAAAGTACTGTCCCTCC</u>         |
| pDSW206_ompC_HindIII Rev              | CGCTA <u>AGCTTTT</u> AGAACTGGTAAACCAGACCCAGAGC     |

---

\* sites for mutagenesis or restriction enzyme cleavage, where relevant, are underlined.



**Table S4. Summary of all-atom molecular simulations: system compositions and simulation times**

| <b>Protein Configuration</b>                            | <b>Lipids</b> | <b>Water and Ions</b>                                             | <b>Simulation time (# of simulations x ns)</b> |
|---------------------------------------------------------|---------------|-------------------------------------------------------------------|------------------------------------------------|
| MlaA                                                    | N/A           | 9439 H <sub>2</sub> O<br>29 K <sup>+</sup><br>19 Cl <sup>-</sup>  | 1 x 500                                        |
| MlaA                                                    | 272 DMPE      | 11734 H <sub>2</sub> O<br>42 K <sup>+</sup><br>32 Cl <sup>-</sup> | 1 x 500                                        |
| OmpC trimer<br>MlaA (ClusPro model) in<br>orientation 1 | 980 DMPE      | 36113 H <sub>2</sub> O<br>98 K <sup>+</sup><br>98 Cl <sup>-</sup> | 1 x 500<br>1 x 320<br>1 x 130                  |
| OmpC trimer<br>MlaA (ClusPro model) in<br>orientation 2 | 980 DMPE      | 36113 H <sub>2</sub> O<br>98 K <sup>+</sup><br>98 Cl <sup>-</sup> | 1 x 500<br>1 x 500                             |

## Supplementary Figures

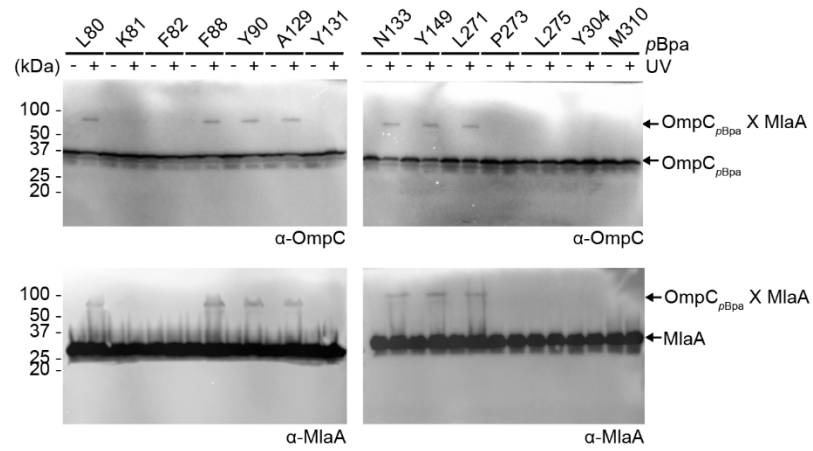

**Figure S1.** Seven more positions at the dimeric interface of the OmpC trimer contact MlaA. Immunoblots showing UV-dependent formation of crosslinks between OmpC and MlaA in  $\Delta ompC$  cells expressing OmpC substituted with  $\rho Bpa$  at indicated positions, selected as part of the localized search.

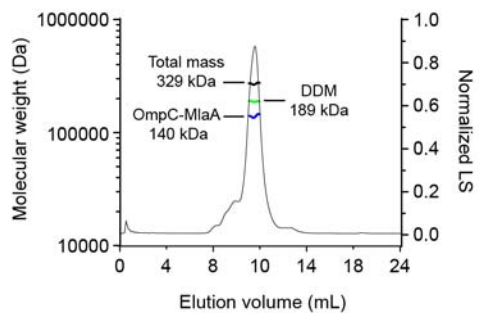

**Figure S2.** SEC-MALS analysis of the OmpC-MlaA complex revealing that one copy of MlaA binds to the OmpC trimer. As indicated, total molecular mass: 329 ( $\pm$  0.4%) kDa; protein molecular mass: 140 ( $\pm$  0.4%) kDa (observed), 148 kDa (predicted, OmpC<sub>3</sub>MlaA); modifier (DDM) molecular mass: 189 ( $\pm$  0.8%) kDa. Numbers stated after  $\pm$  show statistical consistency of analysis.

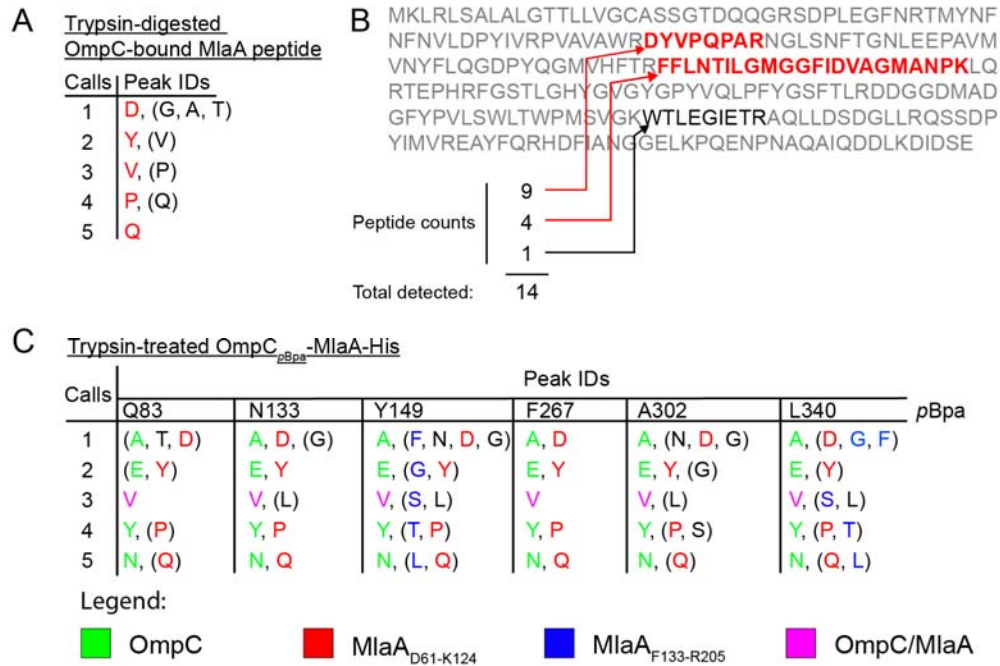

**Figure S3.** N-terminal sequencing and MS/MS analyses identified two specific MlaA peptides binding to OmpC. (A) First five residue calls for the MlaA peptide remaining bound to OmpC after trypsin digestion (see Fig. 2A) revealed that it starts with D<sup>61</sup>YVPQ of full-length MlaA protein. (B) MS/MS analysis of the MlaA peptide remaining bound to OmpC after trypsin digestion detected two MlaA fragments with high peptide counts (sequences colored *red*), suggesting that the OmpC-bound peptide has boundaries from D61 to K124. (C) First five residue calls for protein bands containing MlaA peptides crosslinked to OmpC<sub>pBpa</sub> (see Fig. 2B) revealed the presence of MlaA peptides starting with D<sup>61</sup>YVPQ and F<sup>133</sup>GSTL, along with OmpC N-terminus A<sup>21</sup>EVYN. Residue calls are assigned to the respective protein/peptide as denoted by the legend.

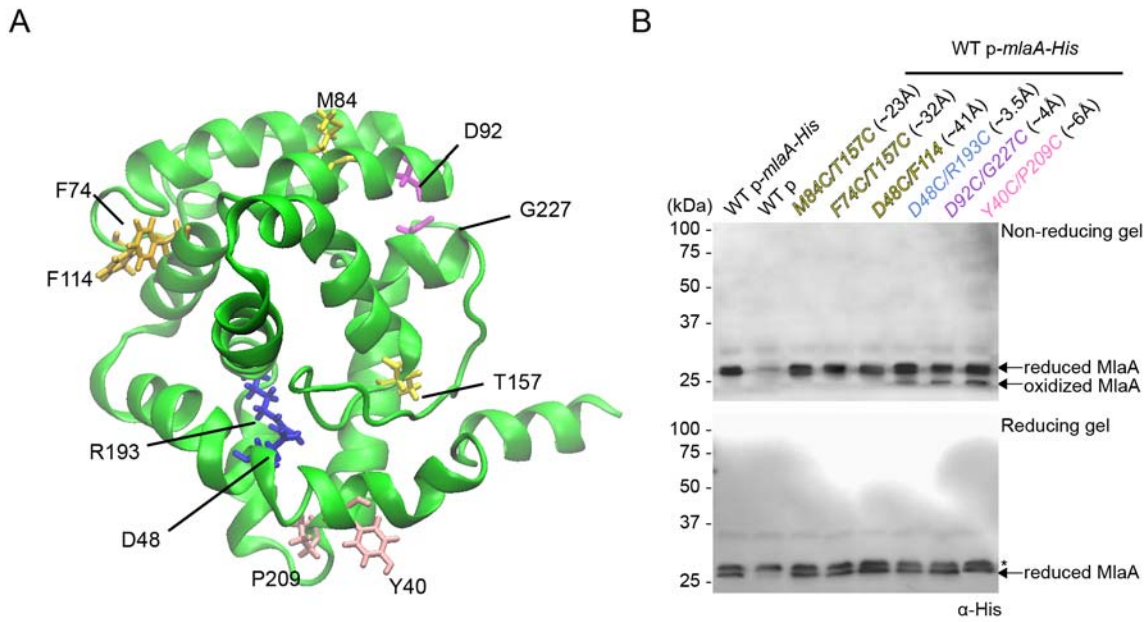

**Figure S4.** Residue pairs on MlaA predicted to contact each other based on coevolution analysis allow the formation of disulfide bonds when substituted with cysteines. (A) Cartoon representation of the MlaA structural model predicted based on residue-residue contacts inferred from co-evolution analysis of metagenomic sequence data prediction (GREMLIN, (10)), with strongly co-evolved residue pairs that are mutated to cysteines highlighted (same colored sticks). The figure was generated using the program PyMOL (12). (B) Immunoblots showing oxidized or reduced forms of indicated MlaA-His double cysteine variants expressed in wild-type cells from the pET23/42 vector (p). Samples were subjected to non-reducing (*top*) or reducing (*bottom*) SDS-PAGE prior to transfer. A protein that cross-reacted with the  $\alpha$ -His antibody is denoted with (\*). Distances between cysteine pairs in unit angstrom ( $\text{\AA}$ ), as measured in the model in (A), are indicated in parentheses.

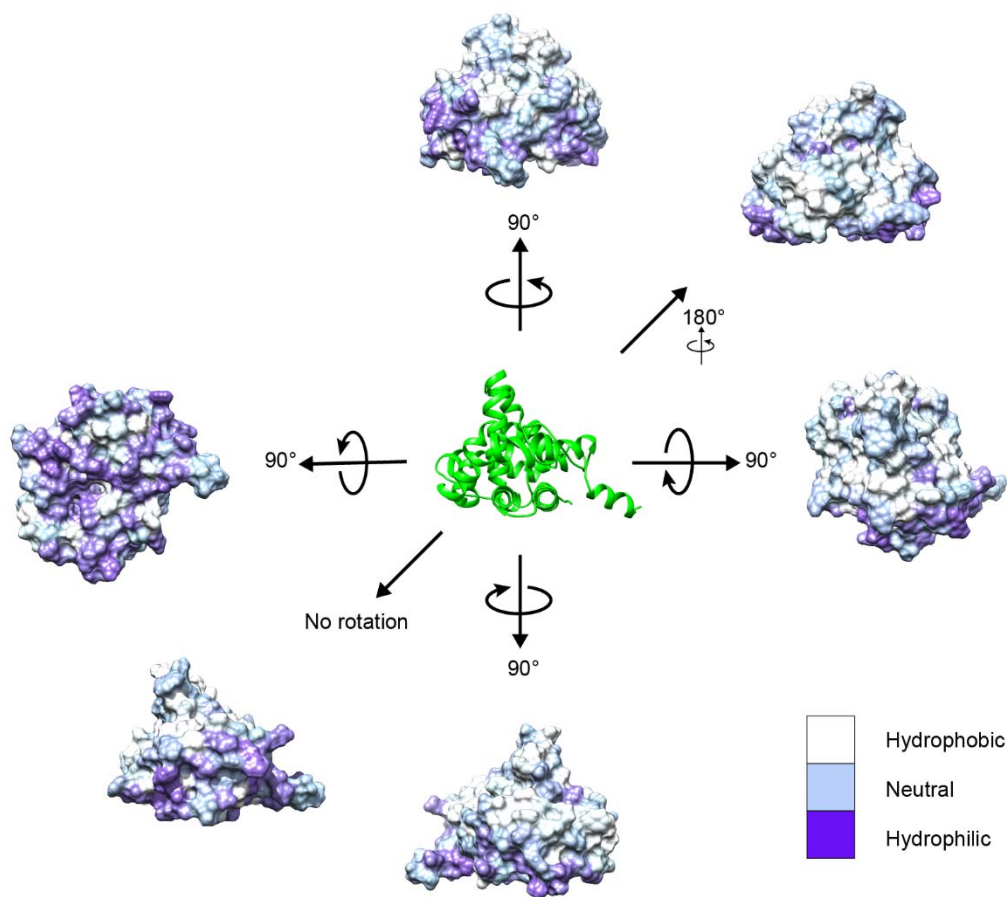

**Figure S5.** The surface of MlaA is mostly hydrophobic. Surface representation of the MlaA model (10) depicted in multiple orientations and colored based on amino acid hydrophobicity. Purple, light blue and white represent most hydrophilic to most hydrophobic amino acids based on the Kyte-Doolittle scale (11). The figures were generated using the program Chimera (13).

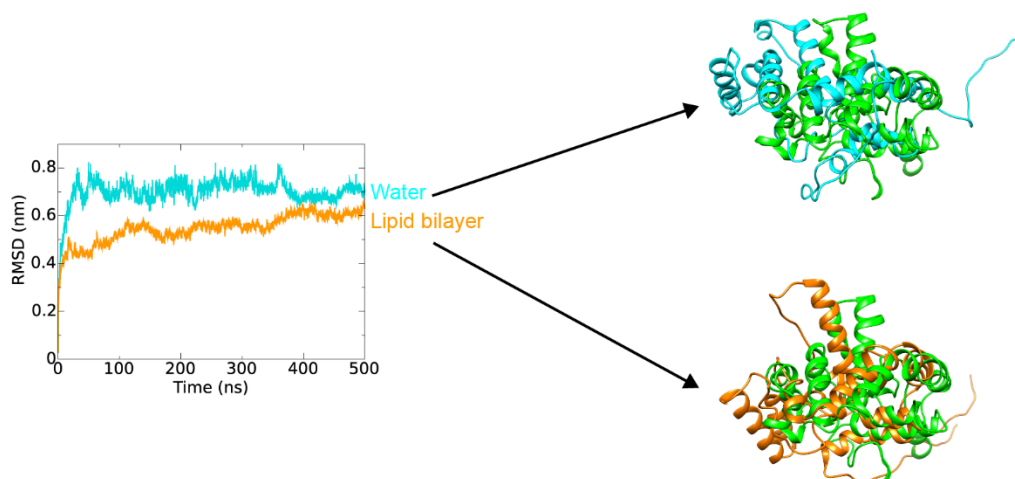

**Figure S6.** The MlaA structure modelled from co-evolution analysis (10) is more stable in the lipid bilayer. Averaged root-mean-square-deviation (RMSD) plots illustrating the changes of the backbone of MlaA models over the course of all-atomistic MD simulations, when placed in water (*cyan*) or in a lipid bilayer (*orange*). Superimpositions of the initial (*green*) and final structures for each simulation are shown on the right. The figures were generated using the program Chimera (13).

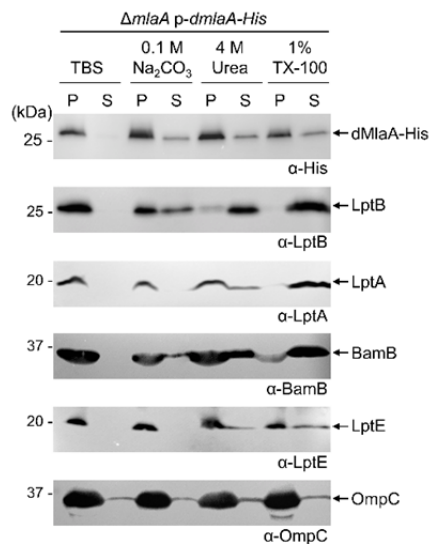

**Figure S7.** MlaA behaves like an integral membrane protein and is resistant to extraction from membranes under various conditions. Immunoblots showing extraction profiles of delipidated MlaA-His (dMlaA-His) from total membranes upon incubation with high pH (0.1 M  $\text{Na}_2\text{CO}_3$ ), chaotropic (4 M urea), or mild detergent (1% (v/v) TX-100) solutions for 1 hour. Samples were subjected to immunoblot analyses after fractionation (insoluble membrane pellet (P) and soluble (S) fractions) by centrifugation. Known peripheral membrane proteins (LptA and LptB), OM lipoproteins (BamB and LptE), and  $\beta$ -barrel proteins (OmpC) are used as controls. Even though both LptA and LptB are peripheral membrane proteins, they exhibit different membrane extraction profiles; while both proteins are easily extracted by 1% TX-100, LptA is more resistant to extraction by 4 M urea. The two OM lipoproteins also exhibit different membrane extraction profiles. Being a lipoprotein with its protein domain residing entirely in the periplasm, BamB appears to have an extraction profile similar to LptA. In contrast, LptE, which is embedded within the lumen of the LptD  $\beta$ -barrel domain, behaves like an integral membrane protein, such as OmpC, and is essentially not extracted from the membrane under the various conditions.



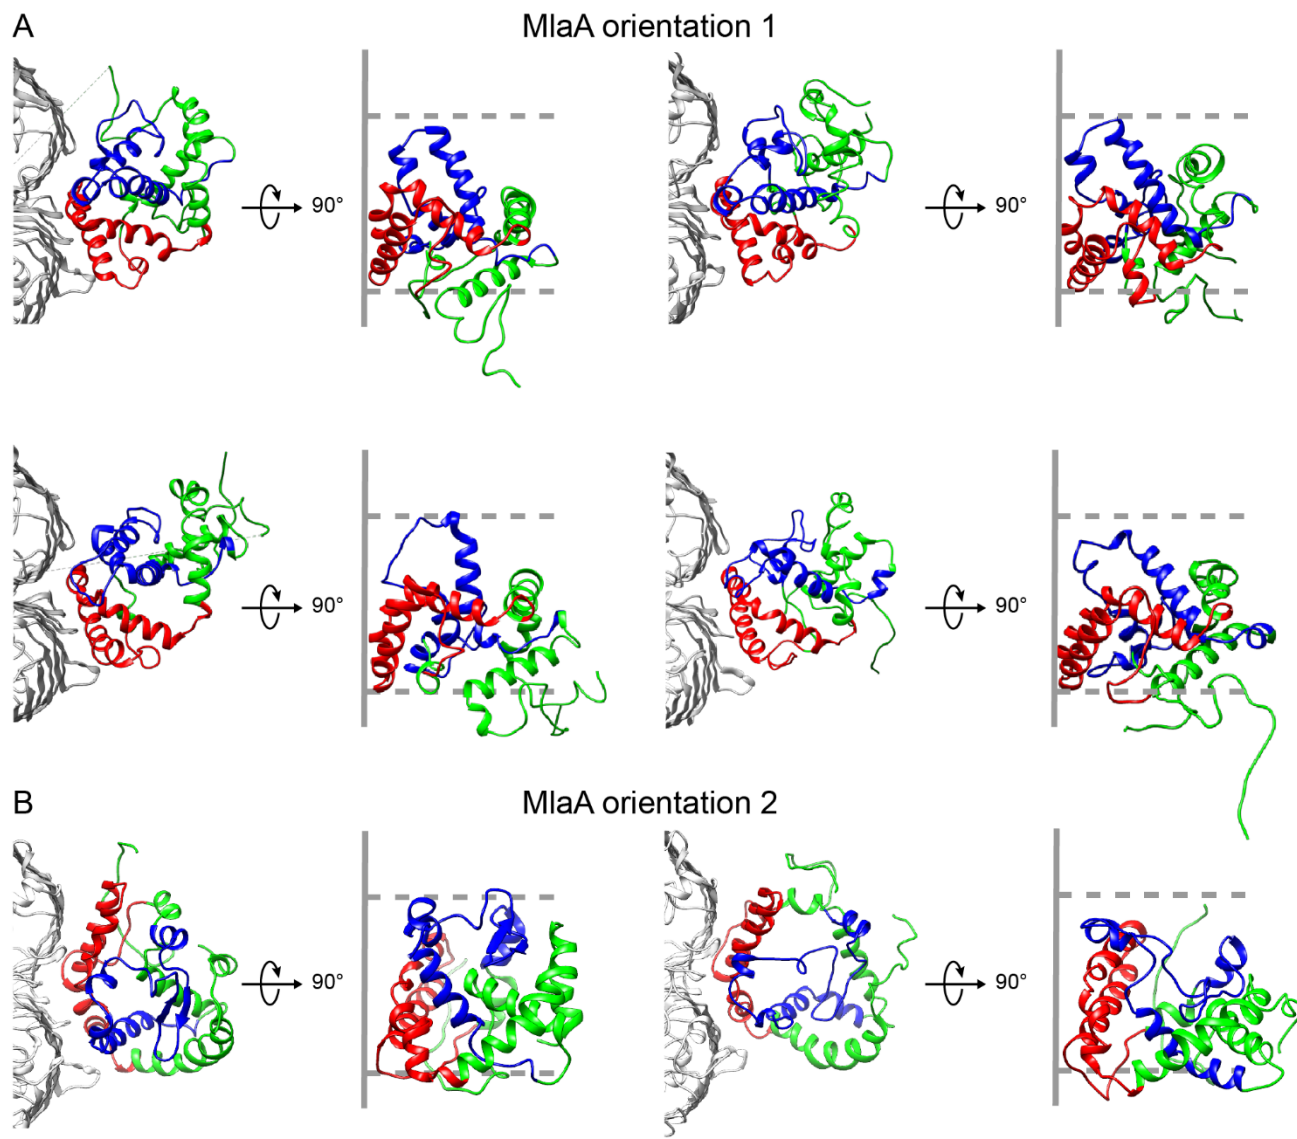

**Figure S8.** Six major clusters of all-atomistic MD simulated OmpC-MlaA structure depict how MlaA interacts with OmpC in two possible orientations in the OM bilayer. The bottom right model in (A) and (B) are reproduced as representative models in Figs. 3A and 3B. MlaA<sub>D61-K124</sub> and MlaA<sub>F133-R205</sub> peptides are highlighted in *red* and *blue*, respectively, as in Fig. 2D. The OM boundaries are indicated as *gray* dashed lines. The figures were generated using the program Chimera (13).

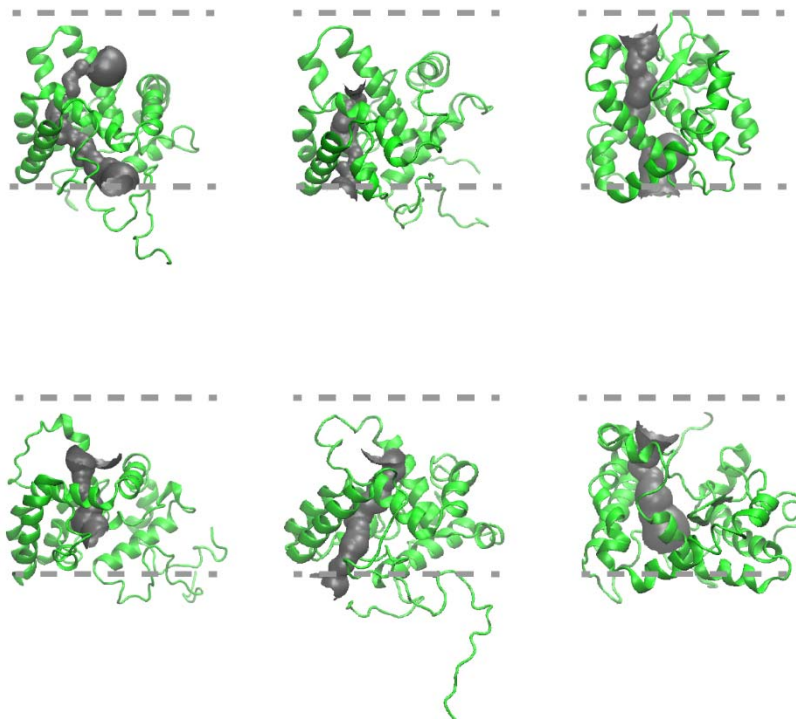

**Figure S9.** All six major clusters of MlaA structure from all-atomistic MD simulations of the OmpC-MlaA complex with putative hydrophilic channels depicted in *gray*. The bottom right model is reproduced in Fig. 4A. The OM boundaries are indicated as *gray* dashed lines. The figures were generated using the program VMD (14).

A

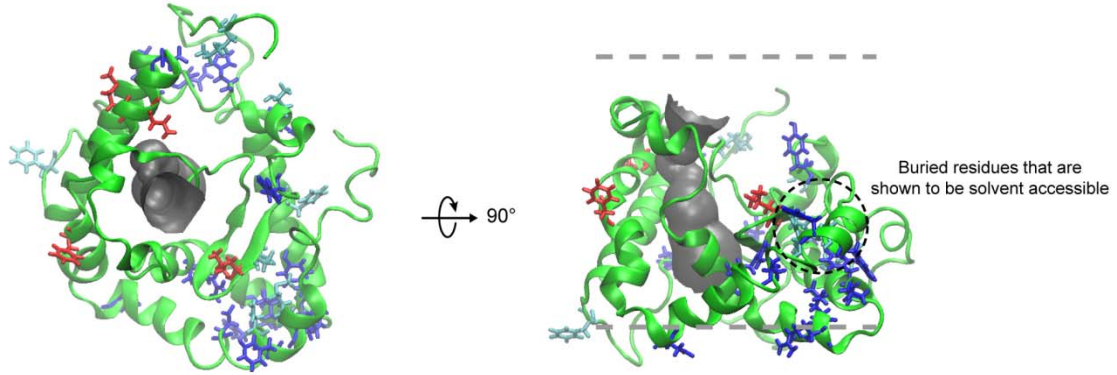

B

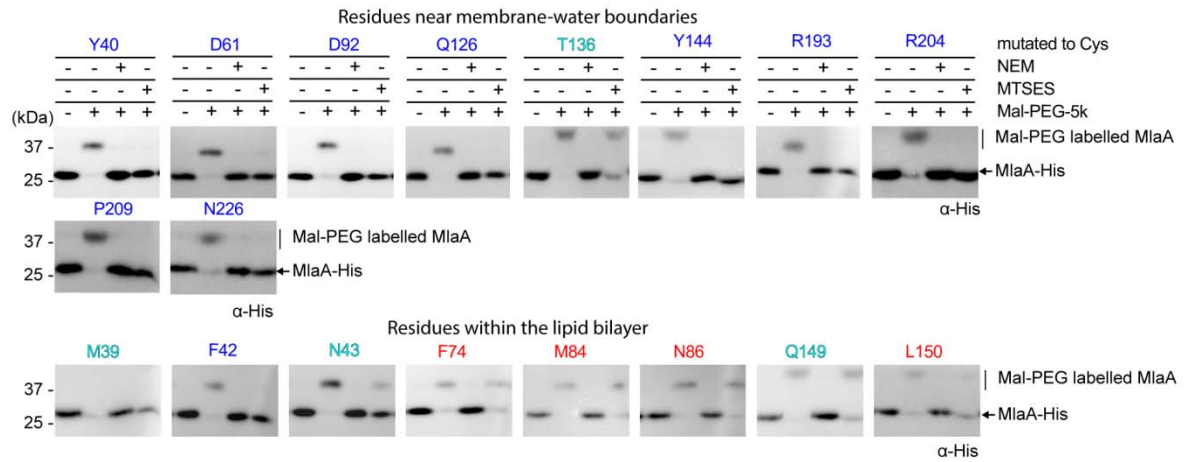

C

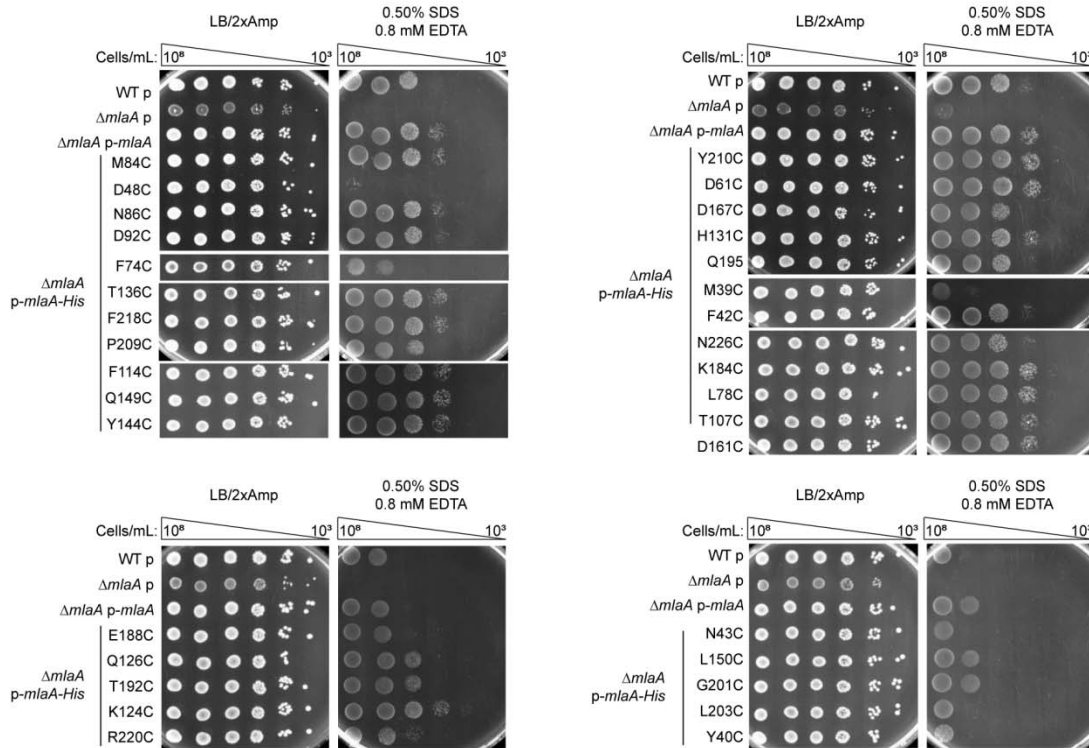

**Figure S10.** Substituted cysteine accessibility for residues in MlaA largely agrees with their predicted locations (near/at membrane-water boundaries or buried within the lipid bilayer). (A) A representative structure of MlaA from all-atomistic MD simulations with its putative channel depicted in *gray*. Non-channel residues that are fully, partially, or not solvent accessible, based on SCAM in (B), are highlighted in *blue*, *cyan*, and *red*, respectively. The figures were generated using the program VMD (14). (B) Immunoblots showing maleimide-polyethylene glycol (Mal-PEG) alkylation of MlaA variants containing channel-facing residues substituted with cysteine (as depicted in (A)) following labelling by membrane permeable *N*-ethylmaleimide (NEM) or impermeable (MTSES) reagents. Mal-PEG alkylated MlaA<sub>Cys</sub>-His variants show a ~5 kDa mass shift. Positions fully, partially, or not blocked by MTSES, which reflects the level of solvent accessibility, are highlighted in *blue*, *cyan*, or *red*, respectively. (C) Analysis of SDS/EDTA sensitivity of wild-type (WT) and  $\Delta mlaA$  strains producing indicated MlaA cysteine variants from the pET23/42 vector (p).

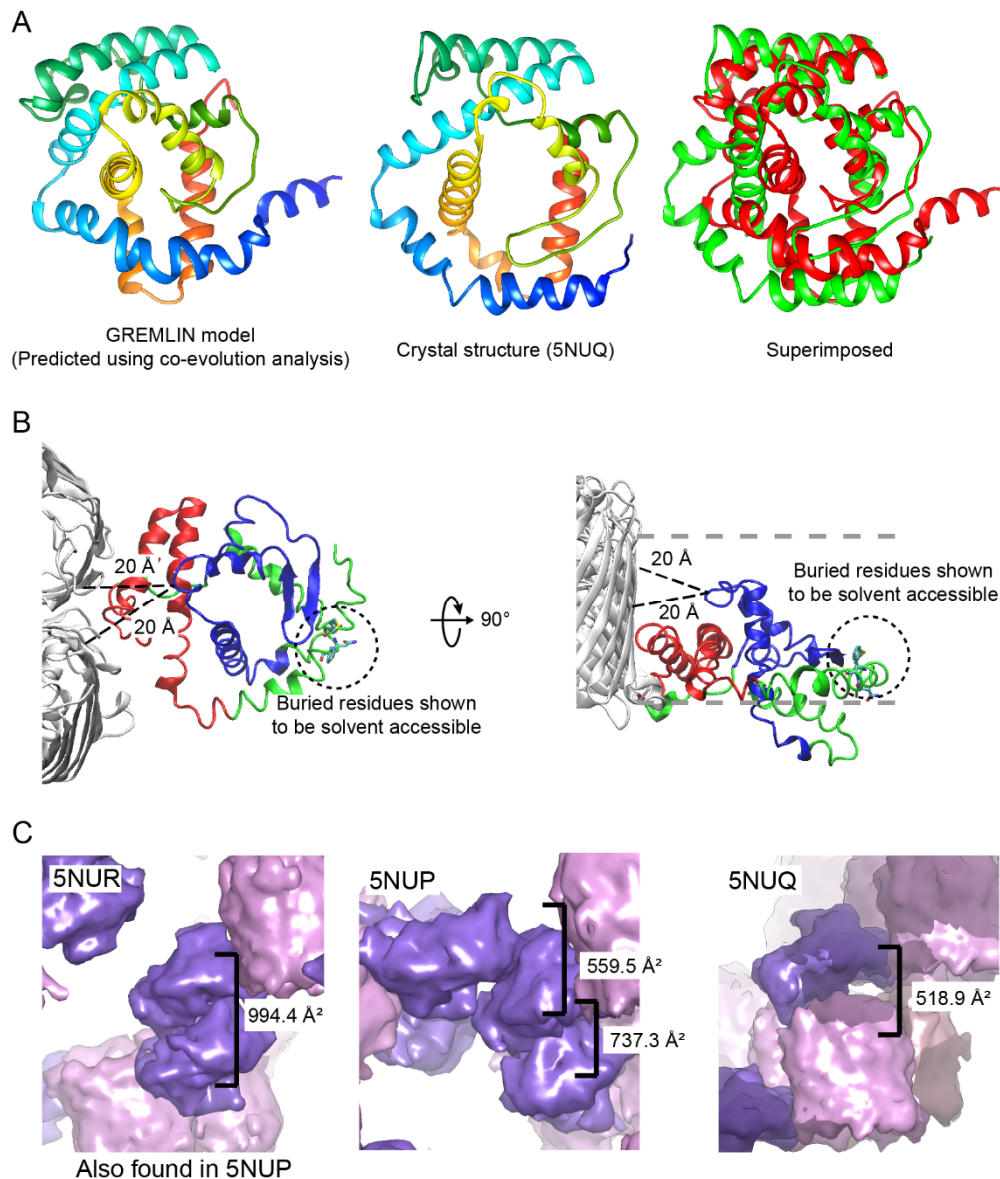

**Figure S11.** Brief analyses of the crystal structures of MlaA-porin complexes. (A) Side-by-side comparison of MlaA model predicted by co-evolution analysis (*left*) with the crystal structure of MlaA derived from the OmpF-MlaA complex (PDB ID: 5NUQ; *middle*). A superimposition of these structures is shown on the right. (B) Cartoon representation of the OmpF-MlaA complex (PDB ID: 5NUQ) in top and side views, with MlaA<sub>D61-K124</sub> and MlaA<sub>F133-R205</sub> peptides highlighted in *red* and *blue*, respectively (as in Fig. 2D). The smallest distances between the MlaA<sub>F133-R205</sub> peptide (*blue*) and porin residues equivalent to L149/L340 in *E. coli* OmpC are indicated. MlaA residues presumably buried in the lipid bilayer but solvent accessible (SCAM; Fig. S10B) are circled and depicted in sticks. (C) Surface representations of MlaA-porin crystal structures illustrating artificial crystal contacts (MlaA-MlaA or MlaA-porin) observed in different crystal forms. The buried surface areas (Å<sup>2</sup>) of these contacts are indicated. Porins and MlaA are shown in *plum* and *medium purple*, respectively. All figures were generated using the program Chimera (13).



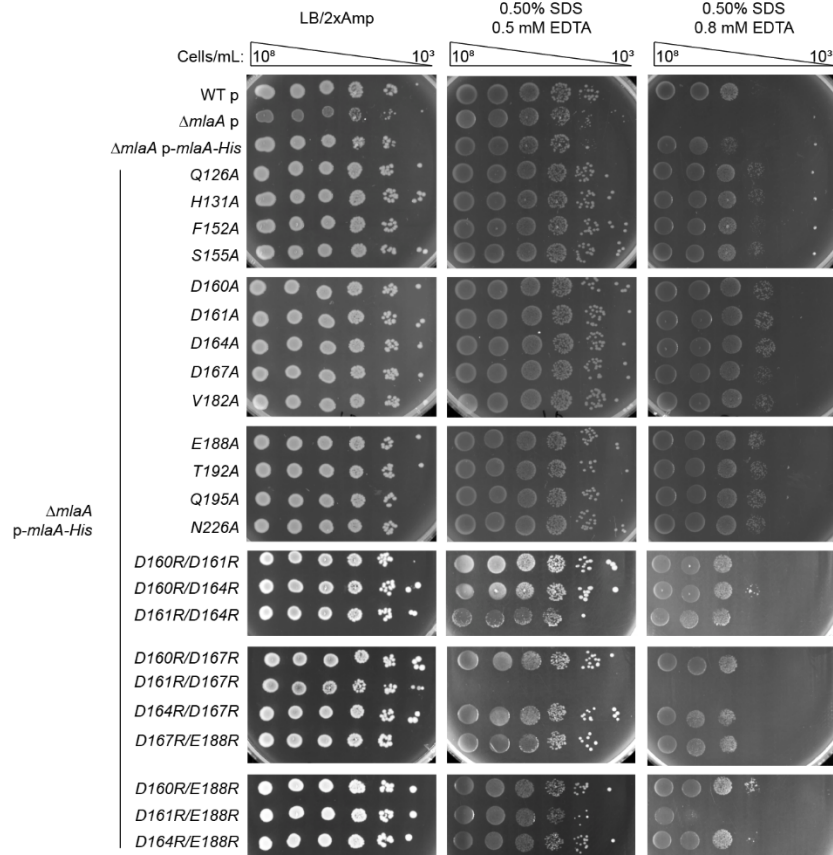

**Figure S12.** All single alanine mutations and most double arginine substitutions in the channel, except D161R/D167R, do not disrupt function in MlaA. Analysis of SDS/EDTA sensitivity of wild-type (WT) and *ΔmIaA* strains producing indicated MlaA channel variants from the pET23/42 vector (p).

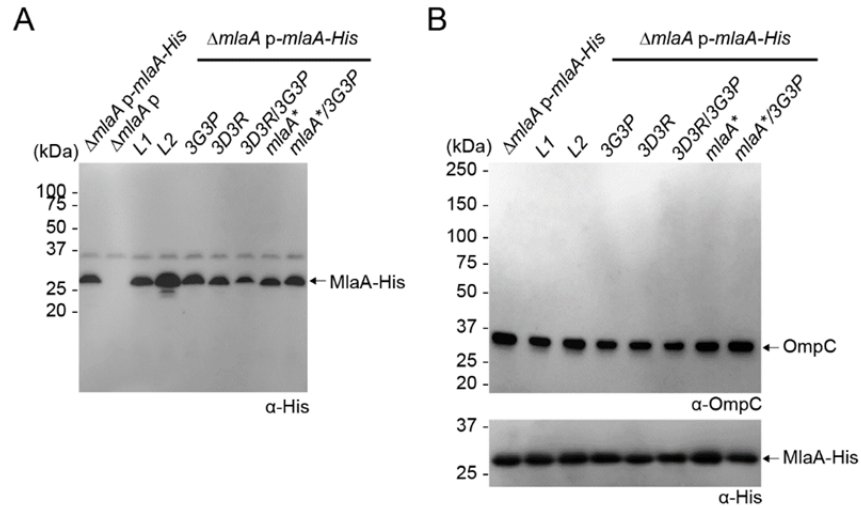

**Figure S13.** Mutations in functional regions of MlaA do not significantly affect protein levels or its interaction with OmpC. (A) Immunoblot showing the levels of indicated MlaA-His variants produced from the pET23/42 vector (p) in the  $\Delta mlaA$  strain. (B) Immunoblots showing OmpC copurified with indicated MlaA-His variants produced from the pET23/42 vector (p) in the  $\Delta mlaA$  strain.

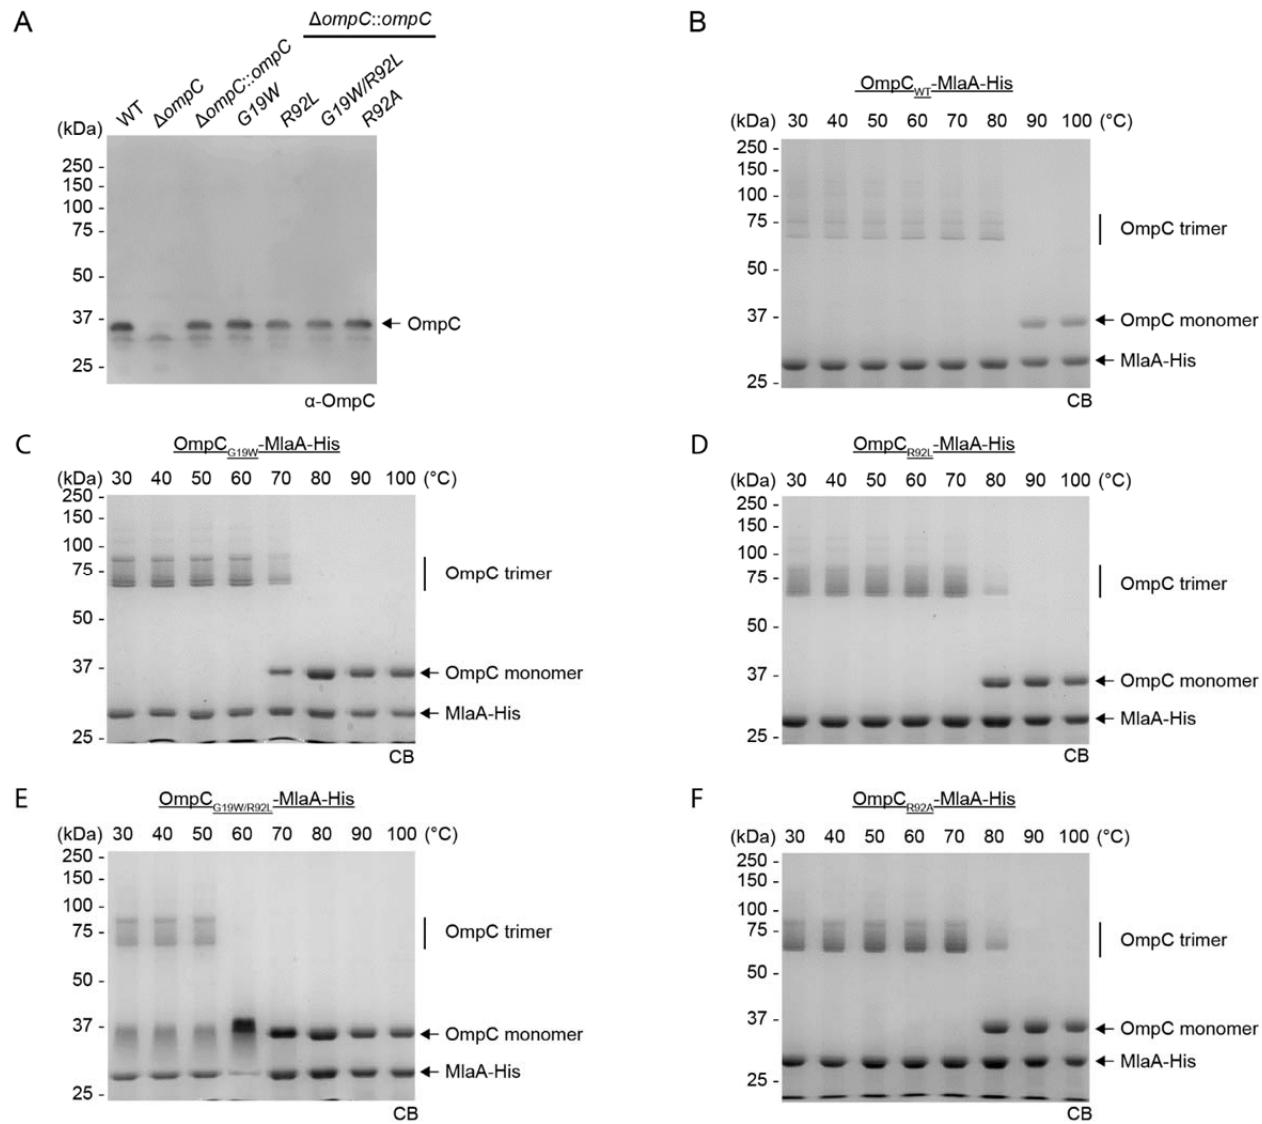

**Figure S14.** Mutations on residues G19 and R92 do not affect OmpC levels in cells, but weaken trimer stability in vitro. (A) Immunoblot showing the levels of wild-type OmpC and indicated OmpC variants produced from the chromosomal locus. (B-F) In vitro temperature titration of purified OmpC-MlaA-His and the indicated variants subjected to semi-native SDS-PAGE (12% Tris.HCl gel), followed by Coomassie blue (CB) staining.



## Supplementary References

1. Casadaban, M. J. (1976) Transposition and fusion of the lac genes to selected promoters in Escherichia coli using bacteriophage lambda and Mu. *J Mol Biol* **104**, 541-555
2. Chong, Z. S., Woo, W. F., and Chng, S. S. (2015) Osmoporin OmpC forms a complex with MlaA to maintain outer membrane lipid asymmetry in Escherichia coli. *Mol Microbiol* **98**, 1133-1146
3. Ruiz, N., Chng, S. S., Hiniker, A., Kahne, D., and Silhavy, T. J. (2010) Nonconsecutive disulfide bond formation in an essential integral outer membrane protein. *Proc Natl Acad Sci U S A* **107**, 12245-12250
4. Wu, T., McCandlish, A. C., Gronenberg, L. S., Chng, S. S., Silhavy, T. J., and Kahne, D. (2006) Identification of a protein complex that assembles lipopolysaccharide in the outer membrane of Escherichia coli. *Proc Natl Acad Sci U S A* **103**, 11754-11759
5. Khetrapal, V., Mehershahi, K., Rafee, S., Chen, S., Lim, C. L., and Chen, S. L. (2015) A set of powerful negative selection systems for unmodified Enterobacteriaceae. *Nucleic Acids Res* **43**, e83
6. Ryu, Y., and Schultz, P. G. (2006) Efficient incorporation of unnatural amino acids into proteins in Escherichia coli. *Nat Methods* **3**, 263-265
7. Murphy, K. C., and Campellone, K. G. (2003) Lambda Red-mediated recombinogenic engineering of enterohemorrhagic and enteropathogenic E. coli. *BMC Mol Biol* **4**, 11
8. Chang, A. C., and Cohen, S. N. (1978) Construction and characterization of amplifiable multicopy DNA cloning vehicles derived from the P15A cryptic miniplasmid. *J Bacteriol* **134**, 1141-1156
9. Weiss, D. S., Chen, J. C., Ghigo, J. M., Boyd, D., and Beckwith, J. (1999) Localization of FtsI (PBP3) to the septal ring requires its membrane anchor, the Z ring, FtsA, FtsQ, and FtsL. *J Bacteriol* **181**, 508-520
10. Ovchinnikov, S., Park, H., Varghese, N., Huang, P. S., Pavlopoulos, G. A., Kim, D. E., Kamisetty, H., Kyrpides, N. C., and Baker, D. (2017) Protein structure determination using metagenome sequence data. *Science* **355**, 294-298
11. Kyte, J., and Doolittle, R. F. (1982) A simple method for displaying the hydropathic character of a protein. *J Mol Biol* **157**, 105-132
12. DeLano, W. L. (2002). PyMOL. DeLano Scientific, San Carlos, CA, 700.
13. Pettersen, E. F., Goddard, T. D., Huang, C. C., Couch, G. S., Greenblatt, D. M., Meng, E. C., and Ferrin, T. E. (2004) UCSF Chimera--a visualization system for exploratory research and analysis. *J Comput Chem* **25**, 1605-1612
14. Humphrey, W., Dalke, A., and Schulten, K. (1996) VMD: visual molecular dynamics. *J Mol Graph* **14**, 33-38, 27-38
